# Supplementary material for: Actinic Keratoses (AK): An Exploratory Questionnaire-Based Study of Patients’ Illness Perceptions
Source: MDPI journal article supplement (doi:10.3390/curroncol29070408), 2022-07-21
Supplement: s1 [file s1]

## Supplementary Tables

Supplementary Table S1a. Illness perception dimensions

| <b>Rating<br/>scale</b> | <b>Duration of the<br/>disease<br/>n (%)</b> | <b>Intensity of<br/>symptoms<br/>n (%)</b> | <b>Understanding of<br/>the disease<br/>n (%)</b> | <b>Concern about<br/>the disease<br/>n (%)</b> |
|-------------------------|----------------------------------------------|--------------------------------------------|---------------------------------------------------|------------------------------------------------|
| 1                       | 43 (21.29)                                   | 107 (52.71)                                | 30 (14.56)                                        | 80 (38.83)                                     |
| 2                       | 9 (4.46)                                     | 25 (12.32)                                 | 13 (6.31)                                         | 13 (6.31)                                      |
| 3                       | 20 (9.90)                                    | 22 (10.84)                                 | 11 (5.34)                                         | 18 (8.74)                                      |
| 4                       | 3 (1.49)                                     | 5 (2.46)                                   | 6 (2.91)                                          | 6 (2.91)                                       |
| 5                       | 23 (11.39)                                   | 15 (7.39)                                  | 10 (4.85)                                         | 23 (11.17)                                     |
| 6                       | 5 (2.48)                                     | 7 (3.45)                                   | 11 (5.34)                                         | 7 (3.40)                                       |
| 7                       | 7 (3.47)                                     | 7 (3.45)                                   | 10 (4.85)                                         | 12 (5.83)                                      |
| 8                       | 9 (4.46)                                     | 4 (1.97)                                   | 16 (7.77)                                         | 15 (7.28)                                      |
| 9                       | 4 (1.98)                                     | 2 (0.99)                                   | 9 (4.37)                                          | 2 (0.97)                                       |
| 10                      | 79 (39.11)                                   | 9 (4.43)                                   | 90 (43.69)                                        | 30 (14.56)                                     |

Supplementary Table S1b. Illness perception dimensions

(continued)

| <b>Rating<br/>scale</b> | <b>How much is<br/>solar radiation<br/>responsible for<br/>the illness n (%)</b> | <b>Sunscreen use<br/>BEFORE<br/>diagnosis n (%)</b> | <b>Sunscreen use<br/>AFTER diagnosis n<br/>(%)</b> | <b>Financial<br/>burden<br/>n (%)</b> |
|-------------------------|----------------------------------------------------------------------------------|-----------------------------------------------------|----------------------------------------------------|---------------------------------------|
| 1                       | 8 (3.86)                                                                         | 107 (51.94)                                         | 16 (7.73)                                          | 121 (58.17)                           |
| 2                       | 0 (0)                                                                            | 16 (7.77)                                           | 6 (2.90)                                           | 32 (15.38)                            |
| 3                       | 2 (0.97)                                                                         | 13 (6.31)                                           | 6 (2.90)                                           | 9 (4.33)                              |
| 4                       | 2 (0.97)                                                                         | 6 (2.91)                                            | 4 (1.93)                                           | 5 (2.40)                              |
| 5                       | 8 (3.86)                                                                         | 16 (7.77)                                           | 15 (7.25)                                          | 20 (9.62)                             |
| 6                       | 8 (3.86)                                                                         | 5 (2.43)                                            | 1 (0.48)                                           | 3 (1.44)                              |
| 7                       | 11 (5.31)                                                                        | 5 (2.43)                                            | 6 (2.90)                                           | 2 (0.96)                              |
| 8                       | 24 (11.59)                                                                       | 8 (3.88)                                            | 27 (13.04)                                         | 5 (2.40)                              |
| 9                       | 15 (7.25)                                                                        | 2 (0.97)                                            | 11 (5.31)                                          | 0 (0)                                 |
| 10                      | 129 (62.32)                                                                      | 28 (13.59)                                          | 115 (55.56)                                        | 11 (5.29)                             |

Supplementary Table S2. Treatment perception dimensions

| Rating scale | Perception of treatment plan<br>n (%) | Ease to comply with treatment<br>n (%) | Feeling of control by treatment<br>n (%) |
|--------------|---------------------------------------|----------------------------------------|------------------------------------------|
| 1            | 8 (3.88)                              | 2 (0.97)                               | 1 (0.49)                                 |
| 2            | 6 (2.91)                              | 1 (0.49)                               | 3 (1.46)                                 |
| 3            | 9 (4.37)                              | 3 (1.46)                               | 1 (0.49)                                 |
| 4            | 4 (1.94)                              | 2 (0.97)                               | 0 (0)                                    |
| 5            | 11 (5.34)                             | 10 (4.85)                              | 7 (3.40)                                 |
| 6            | 2 (0.97)                              | 2 (0.97)                               | 4 (1.94)                                 |
| 7            | 11 (5.34)                             | 9 (4.37)                               | 10 (4.85)                                |
| 8            | 19 (9.22)                             | 23 (11.17)                             | 23 (11.17)                               |
| 9            | 11 (5.34)                             | 16 (7.77)                              | 17 (8.25)                                |
| 10           | 125 (60.68)                           | 138 (66.99)                            | 140 (67.96)                              |

Supplementary Table S3. Treatment concerns according to gender

| Concern about treatment | Males (n=168)<br>n* (%) | Females (n=39)<br>n* (%) |
|-------------------------|-------------------------|--------------------------|
| Duration                | 53 (31.55)              | 9 (23.08)                |
| Safety                  | 15 (8.93)               | 4 (10.26)                |
| Efficacy                | 37 (22.02)              | 14 (35.9)                |
| Pain/skin reaction      | 8 (4.76)                | 6 (15.38)                |
| Cosmetic outcome        | 9 (5.36)                | 8 (20.51)                |
| Cost                    | 0 (0)                   | 1 (2.56)                 |
| None of the above       | 62 (36.9)               | 11 (28.21)               |

*\*They do not add up to 208 patients & 100%, because some patients gave more than one choice*

Supplementary Table S4. Prioritization of causal attributions

| n (%)                                       |                 |            |                      |                             |                                 |
|---------------------------------------------|-----------------|------------|----------------------|-----------------------------|---------------------------------|
| <b>1<sup>st</sup> most important factor</b> | Solar radiation | Ageing     | Stress               | Nutrition/Alcohol/Smoking   | Pollution                       |
|                                             | 163 (79.9)      | 11 (5.39)  | 9 (4.41)             | 8 (3.92)                    | 6 (2.94)                        |
| <b>2<sup>nd</sup> most important factor</b> | Ageing          | Stress     | Pollution            | Nutrition/Alcohol/Smoking   | Solar radiation – Accidentally* |
|                                             | 64 (40)         | 34 (21.25) | 23 (14.38)           | 11 (6.88)                   | 10 (6.25)                       |
| <b>3<sup>rd</sup> most important factor</b> | Ageing          | Pollution  | Stress-Accidentally* | Solar radiation-sunscreens* | Vitamin D deficiency            |
|                                             | 32 (24.06)      | 26 (19.55) | 16 (12.03)           | 14 (10.53)                  | 11 (8.27)                       |

*\*Factors with the same percentage rates*

Supplementary Table S5. Causal attributions according to gender n (%)

| Causal attributions               | Males                                 |                                       |                                       | Females                               |                                       |                                       |
|-----------------------------------|---------------------------------------|---------------------------------------|---------------------------------------|---------------------------------------|---------------------------------------|---------------------------------------|
|                                   | 1 <sup>st</sup> most important factor | 2 <sup>nd</sup> most important factor | 3 <sup>rd</sup> most important factor | 1 <sup>st</sup> most important factor | 2 <sup>nd</sup> most important factor | 3 <sup>rd</sup> most important factor |
| Solar radiation                   | 133(81.1)                             | 0 (0)                                 | 0 (0)                                 | 30 (75)                               | 4 (12,9)                              | 4 (13,33)                             |
| Stress                            | 7 (4.27)                              | 24 (18.6)                             | 0 (0)                                 | 2 (5)                                 | 10(32.26)                             | 4 (13.33)                             |
| Ageing                            | 8 (4.88)                              | 57(44.19)                             | 19(18.45)                             | 3 (7,5)                               | 7 (22.58)                             | 13(43.33)                             |
| Pollution                         | 0 (0)                                 | 19(14.73)                             | 21(20.39)                             | 2 (5)                                 | 4 (12.9)                              | 5 (16.67)                             |
| Nutrition/<br>Alcohol/<br>Smoking | 7 (4.27)                              | 0 (0)                                 | 0 (0)                                 | 0 (0)                                 | 0 (0)                                 | 0 (0)                                 |
| Bacteria/Viruses                  | 0 (0)                                 | 0 (0)                                 | 0 (0)                                 | 0 (0)                                 | 0 (0)                                 | 0 (0)                                 |
| Sunscreen                         | 0 (0)                                 | 0 (0)                                 | 13(12.62)                             | 0 (0)                                 | 0 (0)                                 | 0 (0)                                 |
| Vit. D deficiency                 | 0 (0)                                 | 0 (0)                                 | 0 (0)                                 | 0 (0)                                 | 0 (0)                                 | 0 (0)                                 |
| Accidentally                      | 0 (0)                                 | 9 (6.98)                              | 15(14.56)                             | 0 (0)                                 | 0 (0)                                 | 0 (0)                                 |

Supplementary Table S6a. Causal attributions according to educational level n (%)

| Causal attributions               | Primary school                        |                                       |                                       | High school                           |                                       |                                       |
|-----------------------------------|---------------------------------------|---------------------------------------|---------------------------------------|---------------------------------------|---------------------------------------|---------------------------------------|
|                                   | 1 <sup>st</sup> most important factor | 2 <sup>nd</sup> most important factor | 3 <sup>rd</sup> most important factor | 1 <sup>st</sup> most important factor | 2 <sup>nd</sup> most important factor | 3 <sup>rd</sup> most important factor |
| Solar radiation                   | 27 (81.8)                             | 0 (0)                                 | 0 (0)                                 | 64 (75.3)                             | 7 (11.5)                              | 7 (11.5)                              |
| Stress                            | 1 (3.0)                               | 4 (15.4)                              | 1 (5.3)                               | 5 (5.9)                               | 12 (19.7)                             | 5 (1.4)                               |
| Ageing                            | 0 (0)                                 | 10 (38.5)                             | 5 (26.3)                              | 8 (9.4)                               | 21 (34.4)                             | 8 (16.7)                              |
| Pollution                         | 1 (3.0)                               | 6 (23.1)                              | 6 (31.6)                              | 4 (4.7)                               | 10 (16.4)                             | 10 (20.8)                             |
| Nutrition/<br>Alcohol/<br>Smoking | 3 (9.1)                               | 3 (11.5)                              | 0 (0)                                 | 2 (2.4)                               | 4 (6.6)                               | 1 (2.1)                               |
| Bacteria/Viruses                  | 0 (0)                                 | 1 (3.8)                               | 0 (0)                                 | 0 (0)                                 | 1 (1.6)                               | 0 (0)                                 |
| Sunscreen                         | 1 (3.0)                               | 0 (0)                                 | 4 (21.1)                              | 1 (1.2)                               | 1 (1.6)                               | 4 (8.3)                               |
| Vit. D deficiency                 | 0 (0)                                 | 1 (3.8)                               | 2 (10.5)                              | 1 (1.2)                               | 0 (0)                                 | 5 (10.4)                              |
| Accidentally                      | 0 (0)                                 | 1 (3.8)                               | 1 (5.3)                               | 0 (0)                                 | 5 (8.2)                               | 8 (16.7)                              |

Supplementary Table S6b. Causal attributions according to educational level n (%)  
(continued)

| Causal attributions               | University / Technical studies        |                                       |                                       | MSc / PhD title                       |                                       |                                       |
|-----------------------------------|---------------------------------------|---------------------------------------|---------------------------------------|---------------------------------------|---------------------------------------|---------------------------------------|
|                                   | 1 <sup>st</sup> most important factor | 2 <sup>nd</sup> most important factor | 3 <sup>rd</sup> most important factor | 1 <sup>st</sup> most important factor | 2 <sup>nd</sup> most important factor | 3 <sup>rd</sup> most important factor |
| Solar radiation                   | 51 (79.7)                             | 3 (5.6)                               | 0 (0)                                 | 21 (95.5)                             | 0 (0)                                 | 1 (5.6)                               |
| Stress                            | 3 (4.7)                               | 13 (24.1)                             | 6 (12.5)                              | 0 (0)                                 | 5 (26.3)                              | 4 (22.2)                              |
| Ageing                            | 3 (4.7)                               | 25 (46.3)                             | 11 (22.9)                             | 0 (0)                                 | 8 (42.1)                              | 8 (44.4)                              |
| Pollution                         | 1 (1.6)                               | 5 (9.3)                               | 9 (18.8)                              | 0 (0)                                 | 2 (10.5)                              | 1 (5.6)                               |
| Nutrition/<br>Alcohol/<br>Smoking | 2 (3.1)                               | 4 (7.4)                               | 0 (0)                                 | 1 (4.5)                               | 0 (0)                                 | 0 (0)                                 |
| Bacteria/Viruses                  | 1 (1.6)                               | 0 (0)                                 | 1 (2.1)                               | 0 (0)                                 | 0 (0)                                 | 0 (0)                                 |
| Sunscreen                         | 1 (1.6)                               | 3 (5.6)                               | 4 (8.3)                               | 0 (0)                                 | 0 (0)                                 | 2 (11.1)                              |
| Vit. D deficiency                 | 0 (0)                                 | 0 (0)                                 | 4 (8.3)                               | 0 (0)                                 | 1(5.3)                                | 0 (0)                                 |
| Accidentally                      | 1 (1.6)                               | 1 (1.9)                               | 5 (10.4)                              | 0 (0)                                 | 3 (15.8)                              | 2 (11.1)                              |

Supplementary Table S7. Causal attributions according to skin cancer history n (%)

| Causal attributions               | With skin cancer history              |                                       |                                       | Without skin cancer history           |                                       |                                       |
|-----------------------------------|---------------------------------------|---------------------------------------|---------------------------------------|---------------------------------------|---------------------------------------|---------------------------------------|
|                                   | 1 <sup>st</sup> most important factor | 2 <sup>nd</sup> most important factor | 3 <sup>rd</sup> most important factor | 1 <sup>st</sup> most important factor | 2 <sup>nd</sup> most important factor | 3 <sup>rd</sup> most important factor |
| Solar radiation                   | 38 (90.5)                             | 0 (0)                                 | 3 (11.5)                              | 123 (76.9)                            | 9 (7.1)                               | 11 (10.3)                             |
| Stress                            | 1 (2.4)                               | 4 (12.1)                              | 7 (26.9)                              | 8 (5.0)                               | 30 (23.6)                             | 9 (8.4)                               |
| Ageing                            | 1 (2.4)                               | 16 (48.5)                             | 4 (15.4)                              | 10 (6.3)                              | 48 (37.8)                             | 28 (26.2)                             |
| Pollution                         | 1 (2.4)                               | 4 (12.1)                              | 3 (11.5)                              | 5 (3.1)                               | 19 (15.0)                             | 23 (21.5)                             |
| Nutrition/<br>Alcohol/<br>Smoking | 0 (0)                                 | 3 (9.1)                               | 1 (3.8)                               | 8 (5.0)                               | 8 (6.3)                               | 2 (1.9)                               |
| Bacteria/Viruses                  | 0 (0)                                 | 1 (3.0)                               | 0 (0)                                 | 1 (0.6)                               | 1 (0.8)                               | 1 (0.9)                               |
| Sunscreen                         | 1 (2.4)                               | 2 (6.1)                               | 3 (11.5)                              | 2 (1.3)                               | 2 (1.6)                               | 11 (10.3)                             |
| Vit. D deficiency                 | 0 (0)                                 | 0 (0)                                 | 4 (15.4)                              | 1 (0.6)                               | 2 (1.6)                               | 7 (6.5)                               |
| Accidentally                      | 0 (0)                                 | 2 (6.1)                               | 1 (3.8)                               | 1 (0.6)                               | 8 (6.3)                               | 15 (14.0)                             |



Supplementary Tables S8. Statistically significant correlations

Table S8a. Statistically significant correlations of gender (a)

|                                                    | <b>n (%)</b> | <b>n (%)</b> | <b>n (%)</b>  |
|----------------------------------------------------|--------------|--------------|---------------|
| <b>How many AK do you know that you have?</b>      | 2-3          | 4+           | I do not know |
| Males                                              | 32 (19.28)   | 79 (47.59)   | 55 (33.13)    |
| Females                                            | 18 (46.15)   | 15 (38.46)   | 6 (15.38)     |
| <b>How many AK treatments do you have already?</b> | 0            | 1-3          | 4+            |
| Males                                              | 21 (12.5)    | 64 (38.1)    | 83 (49.4)     |
| Females                                            | 2 (5.13)     | 24 (61.54)   | 13 (33.33)    |

Table S8b. Statistically significant correlations of gender (b)

|                                               | <b>Median<br/>(25<sup>th</sup> – 75<sup>th</sup><br/>percentiles)</b> | <b>Range</b> |
|-----------------------------------------------|-----------------------------------------------------------------------|--------------|
| <b>How much does your illness affect you?</b> |                                                                       |              |
| Males                                         | 3 (1-7)                                                               | 1-10         |
| Females                                       | 5 (1-10)                                                              | 1-10         |
| <b>Sunscreen use BEFORE diagnosis</b>         |                                                                       |              |
| Males                                         | 1 (1-4)                                                               | 1-10         |
| Females                                       | 5 (2-10)                                                              | 1-10         |
| <b>Sunscreen use AFTER diagnosis</b>          |                                                                       |              |
| Males                                         | 10 (5-10)                                                             | 1-10         |
| Females                                       | 10 (9-10)                                                             | 1-10         |
| <b>Financial burden</b>                       |                                                                       |              |
| Males                                         | 1 (1-2)                                                               | 1-10         |
| Females                                       | 2 (1-5)                                                               | 1-10         |

Table S8c. Statistically significant correlations of working or activities outdoors history

| <b>Number of treatments</b>                           | <b>0</b>                                                      | <b>1-3</b>   | <b>4+</b>  |
|-------------------------------------------------------|---------------------------------------------------------------|--------------|------------|
| History of working/activities outdoors                | 7 (7.22)                                                      | 37 (38.14)   | 53 (54.64) |
| No history of working/activities outdoors             | 16 (14.68)                                                    | 50 (45.87)   | 43 (39.45) |
| <b>Likely to receive treatment if AK precancerous</b> | <b>Yes</b>                                                    | <b>No</b>    |            |
| History of working/activities outdoors                | 89 (92.71)                                                    | 7 (7.29)     |            |
| No history of working/activities outdoors             | 85 (80.19)                                                    | 21 (19.81)   |            |
| <b>Sunscreen use BEFORE diagnosis</b>                 | <b>Median (25<sup>th</sup> – 75<sup>th</sup> percentiles)</b> | <b>Range</b> |            |
| History of working/activities outdoors                | 1 (1-4.5)                                                     | 1-10         |            |
| No history of working/activities outdoors             | 2 (1-7)                                                       | 1-10         |            |

Table S8d. Tendency to statistically significant correlations of solarium use history

|                                                           | <b>Median<br/>(25<sup>th</sup> – 75<sup>th</sup><br/>percentiles)</b> | <b>Range</b> |
|-----------------------------------------------------------|-----------------------------------------------------------------------|--------------|
| <b>Sunscreen use BEFORE diagnosis</b>                     |                                                                       |              |
| History of solarium                                       | 6 (1-10)                                                              | 1-10         |
| No history of solarium                                    | 1 (1-5)                                                               | 1-10         |
| <b>Financial burden</b>                                   |                                                                       |              |
| History of solarium                                       | 2 (1-6)                                                               | 1-10         |
| No history of solarium                                    | 1 (1-2)                                                               | 1-10         |
| <b>Ease to comply with treatment</b>                      |                                                                       |              |
| No history of solarium                                    | 10 (10-10)                                                            | 6-10         |
| No history of solarium                                    | 10 (8-10)                                                             | 1-10         |
| <b>Feeling of control of the disease<br/>by treatment</b> |                                                                       |              |
| History of solarium                                       | 10 (10-10)                                                            | 8-10         |
| No history of solarium                                    | 10 (8.5-10)                                                           | 1-10         |

Table S8e. Statistically significant correlations of skin cancer history

| <b>Do you know the term AK?</b>                                                        | <b>Yes<br/>n (%)</b>                                                  | <b>No<br/>n (%)</b> |
|----------------------------------------------------------------------------------------|-----------------------------------------------------------------------|---------------------|
| With skin cancer history                                                               | 31 (72.09)                                                            | 12 (27.91)          |
| Without skin cancer history                                                            | 86 (54.43)                                                            | 72 (45.57)          |
| <b>Likely to receive treatment, if about 0.5% of<br/>AK will turn into skin cancer</b> |                                                                       |                     |
| With skin cancer history                                                               | 34 (85)                                                               | 6 (15)              |
| Without skin cancer history                                                            | 97 (68.79)                                                            | 44 (31.21)          |
|                                                                                        | <b>Median<br/>(25<sup>th</sup> – 75<sup>th</sup><br/>percentiles)</b> | <b>Range</b>        |
| <b>Years from AK diagnosis</b>                                                         |                                                                       |                     |
| With skin cancer history                                                               | 6 (2-10)                                                              | 0-25                |
| Without skin cancer history                                                            | 2 (1-4)                                                               | 0-26                |
| <b>How long do you think your illness will<br/>last?</b>                               |                                                                       |                     |
| With skin cancer history                                                               | 10 (5-10)                                                             | 1-10                |
| Without skin cancer history                                                            | 5 (2-10)                                                              | 1-10                |
| <b>How well do you feel you understand your<br/>disease?</b>                           |                                                                       |                     |
| With skin cancer history                                                               | 10 (6-10)                                                             | 1-10                |
| Without skin cancer history                                                            | 8 (3-10)                                                              | 1-10                |
| <b>How much do you think solar radiation is<br/>responsible for your illness?</b>      |                                                                       |                     |
| With skin cancer history                                                               | 10 (8-10)                                                             | 1-10                |
| Without skin cancer history                                                            | 10 (8-10)                                                             | 1-10                |

Table S8f. Statistically significant correlations of level of education

| Level of education             | Do you know the term AK? |            | Understanding of the disease | Sunscreen use BEFORE diagnosis | Financial burden | Understanding of treatment plan | Ease to comply with treatment |
|--------------------------------|--------------------------|------------|------------------------------|--------------------------------|------------------|---------------------------------|-------------------------------|
|                                | Yes n (%)                | No n (%)   | Median (Range)               |                                |                  |                                 |                               |
| Primary school                 | 14 (41.18)               | 20 (58.82) | 4 (1-10)                     | 1 (1-5)                        | 2 (1-10)         | 8 (1-10)                        | 9 (2-10)                      |
| High school                    | 44 (53.66)               | 38 (46.34) | 8 (1-10)                     | 1 (1-10)                       | 1 (1-10)         | 10 (1-10)                       | 10 (1-10)                     |
| University / technical studies | 44 (68.75)               | 20 (31.25) | 9.5 (1-10)                   | 3.5 (1-10)                     | 1 (1-10)         | 10 (2-10)                       | 10 (5-10)                     |
| MSc / PhD title                | 17 (73.91)               | 6 (26.09)  | 9.5 (1-10)                   | 4 (1-10)                       | 2 (1-6)          | 10 (1-10)                       | 10 (7-10)                     |

Table S8g. Statistically significant correlations of age

| Age                                 | Median (25 <sup>th</sup> – 75 <sup>th</sup> percentiles) | Range |
|-------------------------------------|----------------------------------------------------------|-------|
| Knowledge of term AK: Yes           | 69 (65-74)                                               | 34-85 |
| Knowledge of term AK: No            | 72 (67-80)                                               | 40-88 |
| Number of AK lesions: 2-3           | 68 (62-74)                                               | 34-86 |
| Number of AK lesions: 4+            | 70 (66-75)                                               | 49-88 |
| Number of AK lesions: I do not know | 72.5 (67.5-78)                                           | 48-87 |

Table S8h. Spearman's Rho correlation (age)

|                                       | <b>Age</b> |
|---------------------------------------|------------|
| <b>Understanding of the disease</b>   | -0.124     |
| <b>Sunscreen use BEFORE diagnosis</b> | -0.17      |
| <b>Sunscreen use AFTER diagnosis</b>  | -0.143     |
| <b>Financial burden</b>               | -0.127     |

Supplementary Table S9. Statistically significant correlations of knowledge of the term AK

|                                                      | <b>Median<br/>(25<sup>th</sup> – 75<sup>th</sup><br/>percentiles)</b> | <b>Range</b> | <b>p-value</b>   |
|------------------------------------------------------|-----------------------------------------------------------------------|--------------|------------------|
| <b>Understanding of the disease</b>                  |                                                                       |              | <b>&lt;0.001</b> |
| Knowledge of the term AK: Yes                        | 9 (6-10)                                                              | 1-10         |                  |
| Knowledge of the term AK: No                         | 6 (1-10)                                                              | 1-10         |                  |
| <b>How long do you think your illness will last?</b> |                                                                       |              | <b>0.004</b>     |
| Knowledge of the term AK: Yes                        | 8 (3-10)                                                              | 1-10         |                  |
| Knowledge of the term AK: No                         | 3 (1-10)                                                              | 1-10         |                  |
| <b>Understanding of treatment plan</b>               |                                                                       |              | <b>0.044</b>     |
| Knowledge of the term AK: Yes                        | 10 (8-10)                                                             | 1-10         |                  |
| Knowledge of the term AK: No                         | 10 (5-10)                                                             | 1-10         |                  |

Supplementary Table S10. Statistically significant correlations of readiness for treatment, if positive in one of the two questions of information framing

|                                                | Median<br>(25 <sup>th</sup> – 75 <sup>th</sup><br>percentiles) | Range | <i>p</i> -value |
|------------------------------------------------|----------------------------------------------------------------|-------|-----------------|
| <b>Concern about the disease</b>               |                                                                |       | <b>0.042</b>    |
| Likely to receive treatment                    | 3 (1-7)                                                        | 1-10  |                 |
| Not likely to receive treatment                | 1 (1-3)                                                        | 1-10  |                 |
| <b>Understanding of treatment plan</b>         |                                                                |       | <b>0.040</b>    |
| Likely to receive treatment                    | 10 (8-10)                                                      | 1-10  |                 |
| Not likely to receive treatment                | 8 (4-10)                                                       | 2-10  |                 |
| <b>Feeling of disease control by treatment</b> |                                                                |       | <i>0.087</i>    |
| Likely to receive treatment                    | 10 (9-10)                                                      | 1-10  |                 |
| Not likely to receive treatment                | 10 (8-10)                                                      | 3-10  |                 |

## S1. Questionnaire

### Demographics – Patient's characteristics

*Choose the most representative answer for you or complete:*

- Gender: Man / Woman
- Age:
- Education level:
  - 1) Primary school completed
  - 2) High school completed
  - 3) University / technical studies
  - 4) MSc / PhD title

- Do you work outdoors or have outdoor activities (now or in the past)? YES / NO
- Have you got skin cancer history? YES / NO

## **PART A: ILLNESS PERCEPTION QUESTIONS**

*A1. Choose the most representative answer for you or complete:*

- 1. Do you know the term actinic keratosis (AK)? YES / NO**
- 2. Except from your dermatologist, you have heard/ are informed about AK from :**
  - 1) Doctor of another specialty
  - 2) Internet/television
  - 3) Pharmacy
  - 4) Friends / other contacts
  - 5) Family
  - 6) None of the above
- 3. I was diagnosed with AK before... years**
- 4. How many AK do you know that you have?**
  - 1) 2-3
  - 2) 4+
  - 3) I do not know
- 5. How many times did you have already treatment for AK?**
  - 1) 0
  - 2) 1-3
  - 3) 4+
- 6. Which of the following do you feel more familiar with?**
  - 1) Melanoma
  - 2) Basal cell Carcinoma
  - 3) Squamous cell Carcinoma
  - 4) Actinic Keratosis
  - 5) None of the above

*A2. In the following questions please complete the number in a scale from 0 to 10, which best represents your opinion.*



- 1. How long do you think your illness will last?**  
1= very short time 10= forever
- 2. How much do you experience symptoms from your illness (e.g., pain, itch)?**  
1= I feel absolutely nothing 10= very serious symptoms
- 3. How well do you feel you understand your illness?**  
1= not at all 10= absolutely
- 4. How much does your illness affect you (e.g., does it make you angry, scared, upset, depressed)?**  
1= not at all 10= extremely
- 5. Please choose the three (3) most important factors, that according to your opinion are responsible for your illness and put them in prioritization order (putting numbers 1,2,3 aside):**
  - 1) Solar radiation
  - 2) Stress
  - 3) Ageing
  - 4) Pollution
  - 5) Nutrition/ Alcohol/ Smoking
  - 6) Bacteria/Viruses
  - 7) Sunscreen
  - 8) Vitamin D deficiency
  - 9) Accident
- 6. How much do you think solar radiation is responsible for your illness?**  
1= not at all 10= absolutely
- 7. How often did you use sunscreen BEFORE your AK diagnosis?**  
1= never 10= daily
- 8. How often do you use / how willing are you to use sunscreen AFTER your AK diagnosis?**  
1= never 10= daily
- 9. How much do you feel your illness affects (burdens) you financially?**  
1= not at all 10= extremely

## **PART B: INFORMATION FRAMING - AK TREATMENT**

*In the following questions please complete the number in a scale from 0 to 10 or choose the answer, which best represents your opinion.*

- 1. According to the following statement of your dermatologist, how likely would you be to follow treatment for AK? Answer with YES (likely to treat) or NO (not likely to treat)**  
A) AK are precancerous lesions.  
B) About 0.5% of AK turn into a non-life-threatening-skin cancer.
- 2. How much do you feel you understand the suggested treatment plan for your illness?**  
1= not at all 10=absolutely
- 3. How easy do you find to follow the suggested treatment plan?**  
1= impossible 10= absolutely easy
- 4. How much do you think your treatment will help our illness?**  
1= not at all 10= absolutely
- 5. What worries you the most about your illness?**
  - 1) Its duration
  - 2) Its safety
  - 3) Its efficacy
  - 4) Pain/ skin reaction
  - 5) Cosmetic Outcome
  - 6) Cost
  - 7) None of the above
